# Supplementary material
Source: Research Square preprint supplement (doi:10.21203/rs.3.rs-9759844/v1)
Supplement: Supplementary file 1 [file de3c2246aa62b8430e6120c1.docx]

Supplemental files

Table S-1. Demographic and clinical characteristics of patients and stones

| Characteristics | Group A(n=40) | Group B (B=20) | p |
| --- | --- | --- | --- |
| Gender(male/female) | 4/36 | 2/18 | 1.000 |
| Age (mean ± SD) | 46.80 ± 14.56 | 46.35 ± 15.39 | 0.912 |
| BMI | 25.950 ± 4.31 | 26.69 ± 5.32 | 0.565 |
| Comorbidities |  |  |  |
| Hypertension | 19 | 10 | 0.855 |
| Diabetes mellitus | 10 | 5 | 1.000 |
| Stone size (mm), {median (Q1, Q3)}3, 4 | 15.847 (6.475, 19.525) | 17.125 (6.250, 12.650) | 0.766 |
| Stone number (single/multiple) | 22/18 | 9/11 | 0.586 |
| Stone density (HU) | 971.95 (698.25, 1225.25) | 985.20 (889.50, 1165.50) | 0.871 |
| Laterality (left/right) | 24/16 | 11/9 | 0.785 |
| HN (mean ± SD) | 1.0598 ± 0.9575 | 0.9395 ± 0.7616 | 0.627 |
| PCT (mean ± SD) | 0.0433 ± 0.0286 | 0.3425 ± 1.3365 | 0.159 |
| WBC (mean ± SD) | 7.8378 ± 2.5244 | 6.8790 ± 1.3564 | 0.119 |
| Neut (mean ± SD) | 5.1433 ± 2.1301 | 4.1720 ± 0.9897 | 0.058 |
| Neut % (%, mean ± SD) | 64.168 ± 9.6565 | 60.655 ± 7.7205 | 0.163 |
| Lym (mean ± SD) | 1.9058 ± 0.5902 | 1.946 5± 0.7181 | 0.816 |

BMI: body mass index; HN: hydronephrosis; PCT: procalcitonin; WBC: white blood cell; Neut: neutrophil; Neut%: neutrophil percentage; Lym: lymphocyte; the above indicators including PCT, WBC, Neut, Neut%, and Lym are all preoperative statistical data of the patient. Group A: FANS-assisted ureteroscopic lithotripsy; Group B: VISOR-Tech.

Table S-2. Uni- and multivariate logistic regression analysis findings for the stone-free rate

| Variables | Univariate analysis | | Multivariate analysis | |
| --- | --- | --- | --- | --- |
|  | p | OR (95%CI) | p | OR (95%CI) |
| Stone number | 0.014 | 2.970 (1.687~12.829) | 0.607 | 1.641 (0.248~10.852) |
| Stone size | 0.011 | 1.004 (1.000~1.008) | 0.038 | 1.004 (0.999~1.009) |
| Stone density | 0.024 | 0.973 (0.997~1.001) | 0.046 | 1.998 (1.996~2.001) |
| BMI | 0.648 | 0.965 (0.830~1.123) | 0.863 | 0.984 (0.817~1.184) |
| HN | 0.611 | 1.217 (0.571~2.598) | 0.881 | 1.070 (0.441~2.596) |
| Surgery manner |  |  |  |  |
| A |  | 1.000 (reference) |  | 1.000 (reference) |
| B | 0.336 | 0.444(0.085~2.323) | 0.273 | 0.361 (0.058~2.231) |

HN: hydronephrosis; A: FANS-assisted ureteroscopic lithotripsy; B: VIOSR-Tech.
